# Supplementary material for: A general model of conversational dynamics and an example application in serious illness communication
Source: PubMed Central journal article supplement (PMC8248661; doi:10.1371/journal.pone.0253124), 2021-07-01

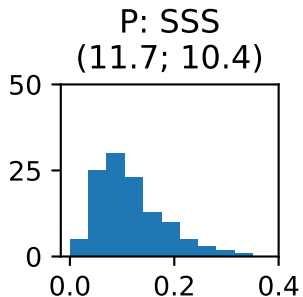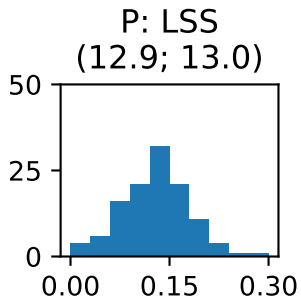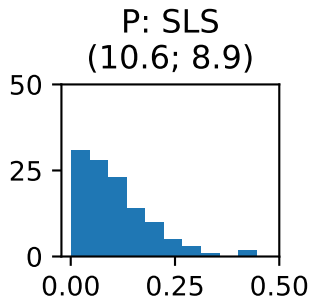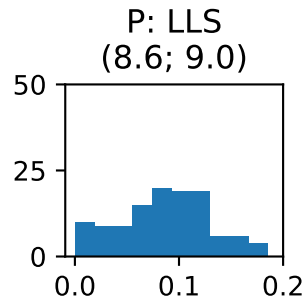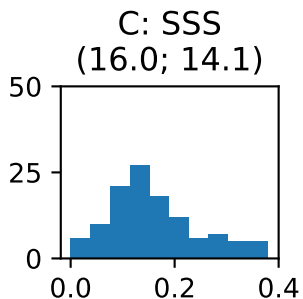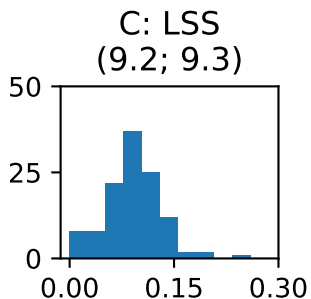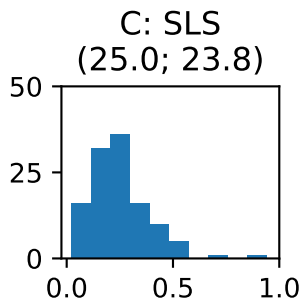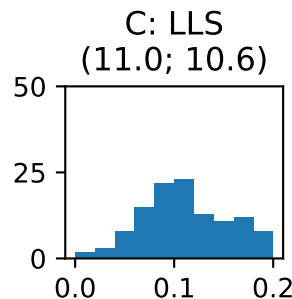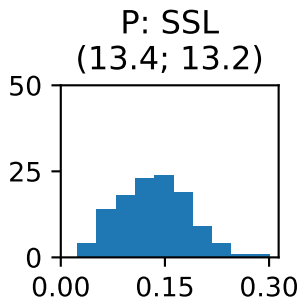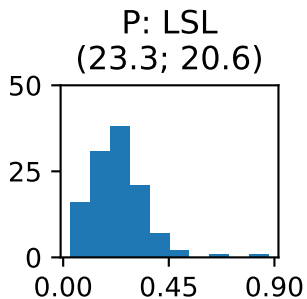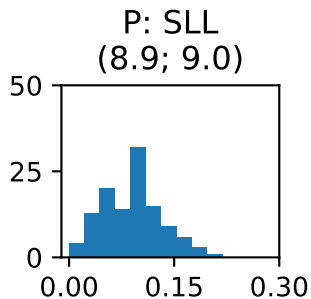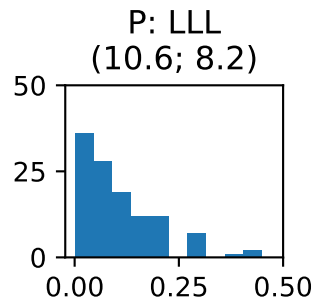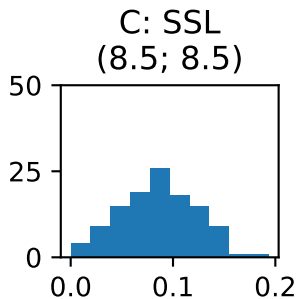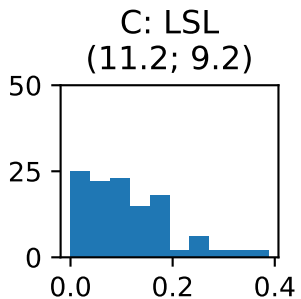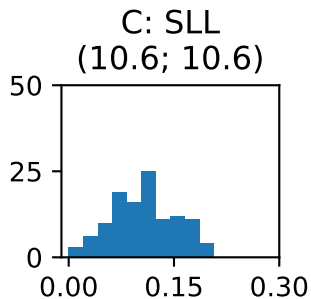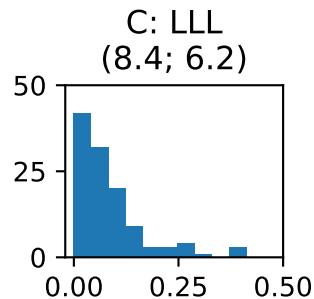

Supplement: pone.0253124.s004.pdf [file pone.0253124.s004.pdf]
