# Supplementary material for: A general model of conversational dynamics and an example application in serious illness communication
Source: PubMed Central journal article supplement (PMC8248661; doi:10.1371/journal.pone.0253124), 2021-07-01

P: SSS  $\rightarrow$  SSL  
(4.2; 3.6)

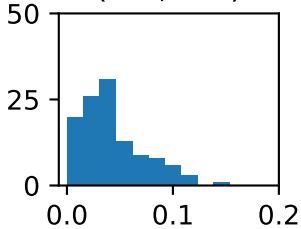

P: LSS  $\rightarrow$  SSL  
(4.2; 4.1)

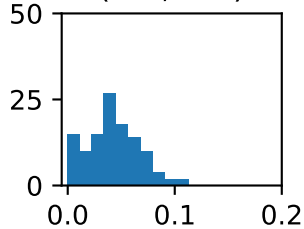

P: SLS  $\rightarrow$  LSL  
(6.3; 4.2)

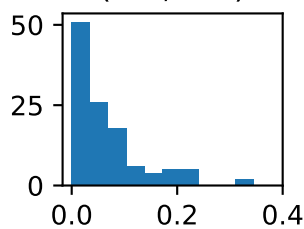

P: LLS  $\rightarrow$  LSL  
(4.6; 4.6)

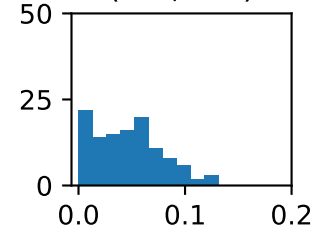

C: SSS  $\rightarrow$  SSL  
(8.3; 7.8)

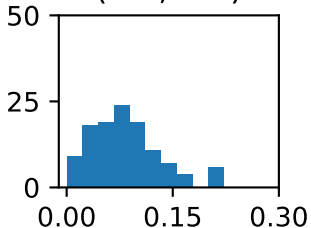

C: LSS  $\rightarrow$  SSL  
(4.8; 4.7)

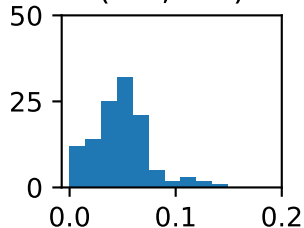

C: SLS  $\rightarrow$  LSL  
(15.9; 12.8)

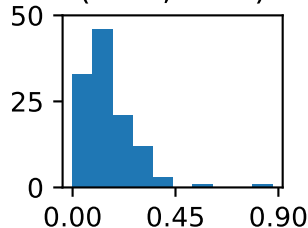

C: LLS  $\rightarrow$  LSL  
(6.8; 6.5)

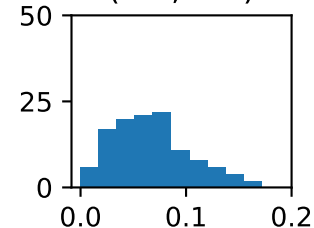

P: SSL  $\rightarrow$  SLL  
(4.1; 3.9)

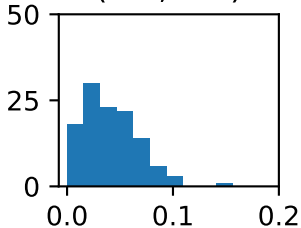

P: LSL  $\rightarrow$  SLL  
(6.9; 6.2)

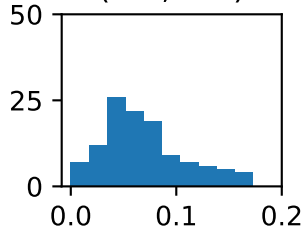

P: SLL  $\rightarrow$  LLL  
(3.7; 3.1)

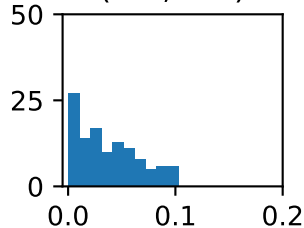

P: LLL  $\rightarrow$  LLL  
(5.0; 2.9)

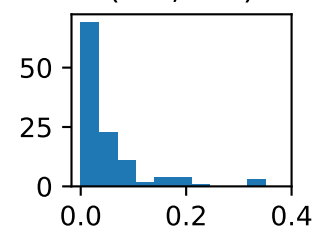

C: SSL  $\rightarrow$  SLL  
(4.0; 3.6)

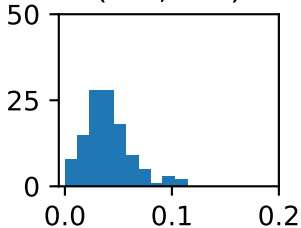

C: LSL  $\rightarrow$  SLL  
(4.9; 4.6)

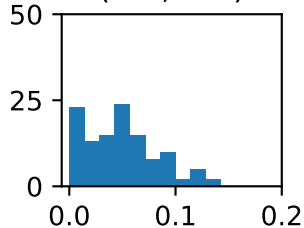

C: SLL  $\rightarrow$  LLL  
(5.3; 4.2)

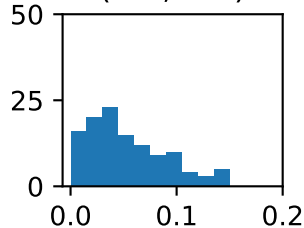

C: LLL  $\rightarrow$  LLL  
(4.9; 2.7)

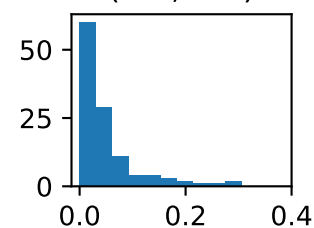

Supplement: pone.0253124.s006.pdf [file pone.0253124.s006.pdf]
