# Supplementary material for: A general model of conversational dynamics and an example application in serious illness communication
Source: PubMed Central journal article supplement (PMC8248661; doi:10.1371/journal.pone.0253124), 2021-07-01

P: SSS  $\rightarrow$  SSS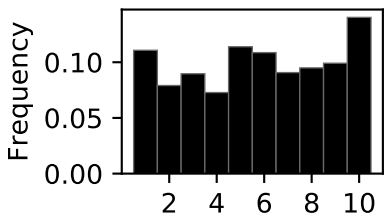C: SSS  $\rightarrow$  SSS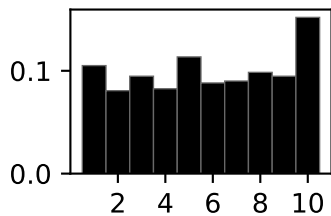P: LSS  $\rightarrow$  SSS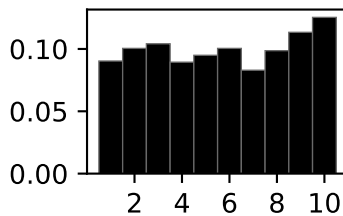C: LSS  $\rightarrow$  SSS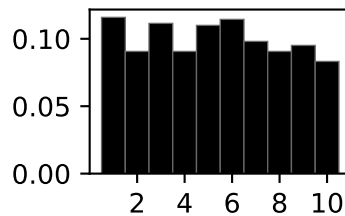P: SLS  $\rightarrow$  LSS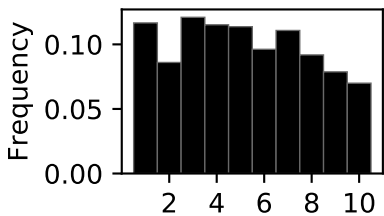C: SLS  $\rightarrow$  LSS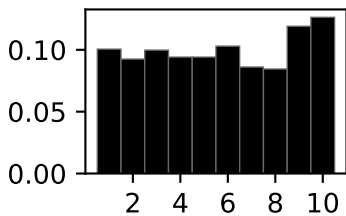P: LLS  $\rightarrow$  LSS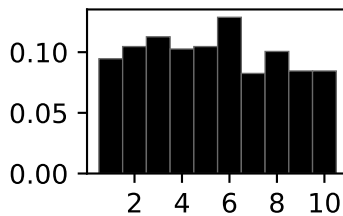C: LLS  $\rightarrow$  LSS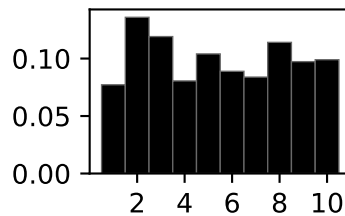P: SSL  $\rightarrow$  SLS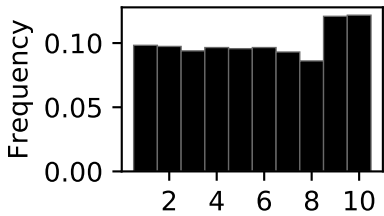C: SSL  $\rightarrow$  SLS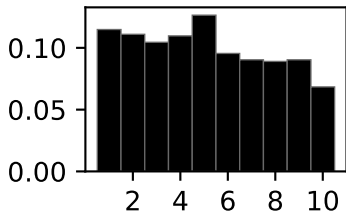P: LSL  $\rightarrow$  SLS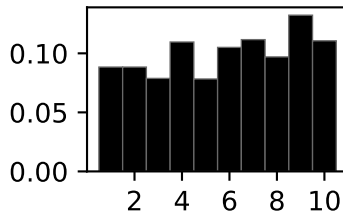C: LSL  $\rightarrow$  SLS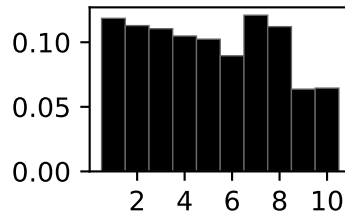P: SLL  $\rightarrow$  LLS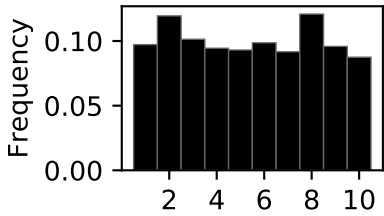C: SLL  $\rightarrow$  LLS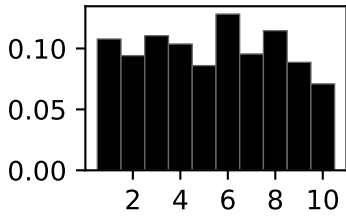P: LLL  $\rightarrow$  LLS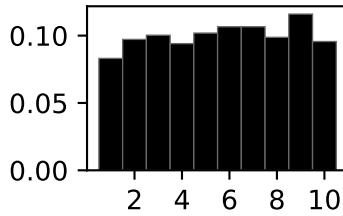C: LLL  $\rightarrow$  LLS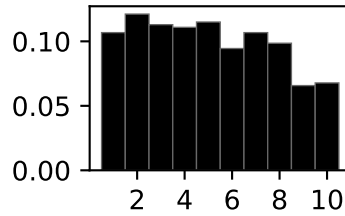

Supplement: pone.0253124.s007.pdf [file pone.0253124.s007.pdf]
