# Supplementary material for: A general model of conversational dynamics and an example application in serious illness communication
Source: PubMed Central journal article supplement (PMC8248661; doi:10.1371/journal.pone.0253124), 2021-07-01

P: SSS  $\rightarrow$  SSL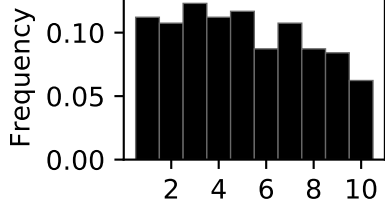C: SSS  $\rightarrow$  SSL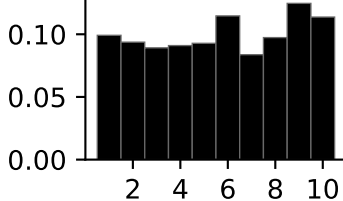P: LSS  $\rightarrow$  SSL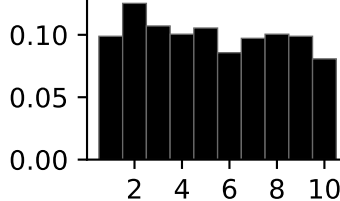C: LSS  $\rightarrow$  SSL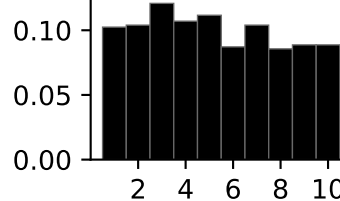P: SLS  $\rightarrow$  LSL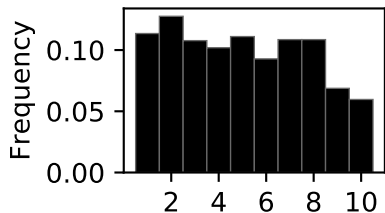C: SLS  $\rightarrow$  LSL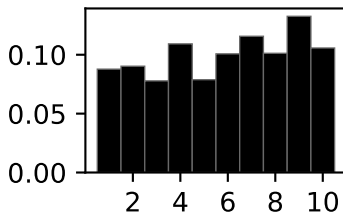P: LLS  $\rightarrow$  LSL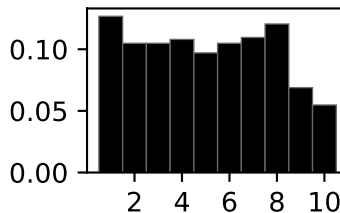C: LLS  $\rightarrow$  LSL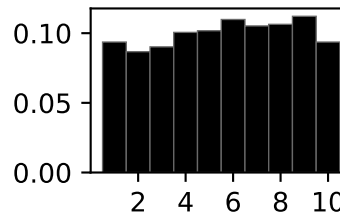P: SSL  $\rightarrow$  SLL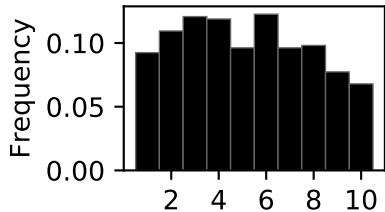C: SSL  $\rightarrow$  SLL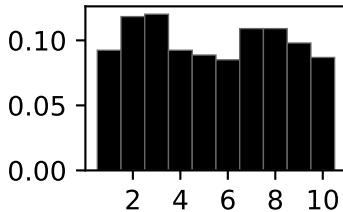P: LSL  $\rightarrow$  SLL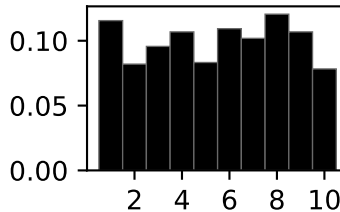C: LSL  $\rightarrow$  SLL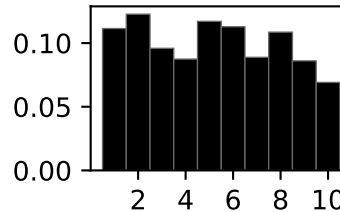P: SLL  $\rightarrow$  LLL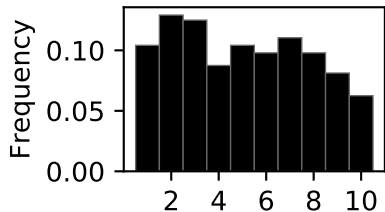C: SLL  $\rightarrow$  LLL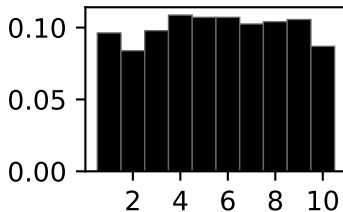P: LLL  $\rightarrow$  LLL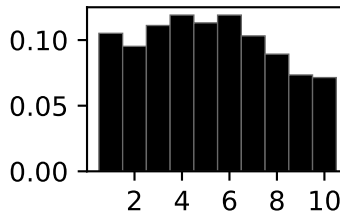C: LLL  $\rightarrow$  LLL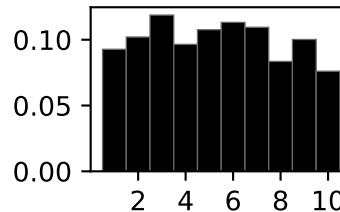

Supplement: pone.0253124.s008.pdf [file pone.0253124.s008.pdf]
