# Supplementary material for: A general model of conversational dynamics and an example application in serious illness communication
Source: PubMed Central journal article supplement (PMC8248661; doi:10.1371/journal.pone.0253124), 2021-07-01

Number of Turns

$10^0$

Words per Turn

$10^1$

$10^2$

$10^3$

$10^2$

$10^1$

$10^0$

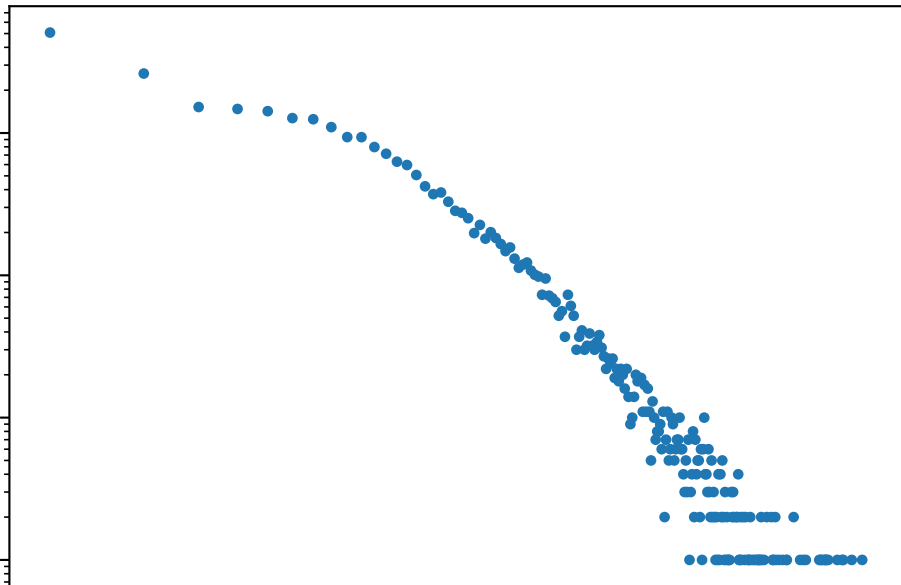

Supplement: pone.0253124.s002.pdf [file pone.0253124.s002.pdf]
