# Supplementary material for: A general model of conversational dynamics and an example application in serious illness communication
Source: PubMed Central journal article supplement (PMC8248661; doi:10.1371/journal.pone.0253124), 2021-07-01
Supplement: pone.0253124.s009.pdf [file pone.0253124.s009.pdf]

**S1 Table. Significance tests of state distributions in PCCRI corpus.** *P* values comparing the state distributions of 3<sup>rd</sup>-order CODYMs for the 117 PCCRI conversations analyzed, stratified by patient and clinician (shown in S3 Fig), of observed patient *vs.* observed clinician (using Mann Whitney U tests), and of observed patient *vs.* null patient models and observed clinician *vs.* null clinician models (by comparing to empirically derived probability distributions, as described in the text).

| State | Patient <i>vs.</i> Clinician | Patient <i>vs.</i> Null | Clinician <i>vs.</i> Null |
|-------|------------------------------|-------------------------|---------------------------|
| SSS   | < 0.001                      | < 0.001                 | < 0.001                   |
| LSS   | < 0.001                      | < 0.001                 | < 0.001                   |
| SLS   | < 0.001                      | < 0.001                 | < 0.001                   |
| LLS   | < 0.001                      | 0.006                   | 0.010                     |
| SSL   | < 0.001                      | 0.002                   | < 0.001                   |
| LSL   | < 0.001                      | < 0.001                 | < 0.001                   |
| SLL   | 0.002                        | 0.009                   | < 0.001                   |
| LLL   | 0.014                        | < 0.001                 | < 0.001                   |
