# Supplementary material for: A general model of conversational dynamics and an example application in serious illness communication
Source: PubMed Central journal article supplement (PMC8248661; doi:10.1371/journal.pone.0253124), 2021-07-01
Supplement: pone.0253124.s011.pdf [file pone.0253124.s011.pdf]

**S3 Table. State comparisons with and without anger or fear.** Mean values of state distributions of 3<sup>rd</sup>-order CODYMs for patient turns in the 117 PCCRI conversations analyzed, stratified by conversations with or without patient audible expressions of anger or fear. *P* values are from Mann Whitney U tests used to compare the underlying distributions of corresponding states.

| State | With Emotion | Without Emotion | <i>P</i> value |
|-------|--------------|-----------------|----------------|
| SSS   | 10.5         | 12.7            | 0.0861         |
| LSS   | 11.9         | 13.7            | 0.0097         |
| SLS   | 12.7         | 8.8             | 0.0261         |
| LLS   | 9.5          | 7.9             | 0.0343         |
| SSL   | 12.2         | 14.5            | 0.0065         |
| LSL   | 21.9         | 24.5            | 0.1485         |
| SLL   | 9.9          | 8.0             | 0.0049         |
| LLL   | 11.4         | 9.9             | 0.1549         |
