# Supplementary material for: A general model of conversational dynamics and an example application in serious illness communication
Source: PubMed Central journal article supplement (PMC8248661; doi:10.1371/journal.pone.0253124), 2021-07-01
Supplement: pone.0253124.s012.pdf [file pone.0253124.s012.pdf]

**S4 Table. Transition comparisons with and without anger or fear.** Mean values of transition distributions of 3<sup>rd</sup>-order CODYMs for patient turns in the 117 PCCRI conversations analyzed, stratified by conversations with or without patient audible expressions of anger or fear. *P* values are from Mann Whitney U tests used to compare the underlying distributions of corresponding transitions.

| Transition            | With Emotion | Without Emotion | <i>P</i> value |
|-----------------------|--------------|-----------------|----------------|
| SSS <sup>s</sup> →SSS | 6.0          | 8.4             | 0.02           |
| SSS <sup>L</sup> →SSL | 4.4          | 4.1             | 0.2109         |
| LSS <sup>s</sup> →SSS | 7.2          | 9.8             | 0.0013         |
| LSS <sup>L</sup> →SSL | 4.7          | 3.7             | 0.0247         |
| SLS <sup>s</sup> →LSS | 4.4          | 4.3             | 0.3705         |
| SLS <sup>L</sup> →LSL | 8.3          | 4.6             | 0.0017         |
| LLS <sup>s</sup> →LSS | 4.3          | 4.0             | 0.1174         |
| LLS <sup>L</sup> →LSL | 5.2          | 4.1             | 0.0206         |
| SSL <sup>s</sup> →SLS | 8.0          | 10.3            | 0.0101         |
| SSL <sup>L</sup> →SLL | 4.1          | 4.2             | 0.4815         |
| LSL <sup>s</sup> →SLS | 15.0         | 17.7            | 0.1595         |
| LSL <sup>L</sup> →SLL | 6.9          | 6.9             | 0.4414         |
| SLL <sup>s</sup> →LLS | 5.7          | 5.0             | 0.079          |
| SLL <sup>L</sup> →LLL | 4.3          | 3.2             | 0.0167         |
| LLL <sup>s</sup> →LLS | 5.4          | 5.8             | 0.4082         |
| LLL <sup>L</sup> →LLL | 6.0          | 4.1             | 0.015          |
